# Supplementary material
Source: PubMed Central journal article supplement (PMC5411365)
Supplement: 11357_2017_9972_MOESM1_ESM.pdf [file 11357_2017_9972_MOESM1_ESM.pdf]

**Supplemental Figure 1. Differences in Fractional Shortening (FS), Ejection Fraction (EF) and E/A Ratio in high dose (red triangles) and low dose (yellow triangles) rapamycin vs. placebo (blue circles). x-axis = value at baseline; y-axis = value at week 11; dotted red lines: no change.**

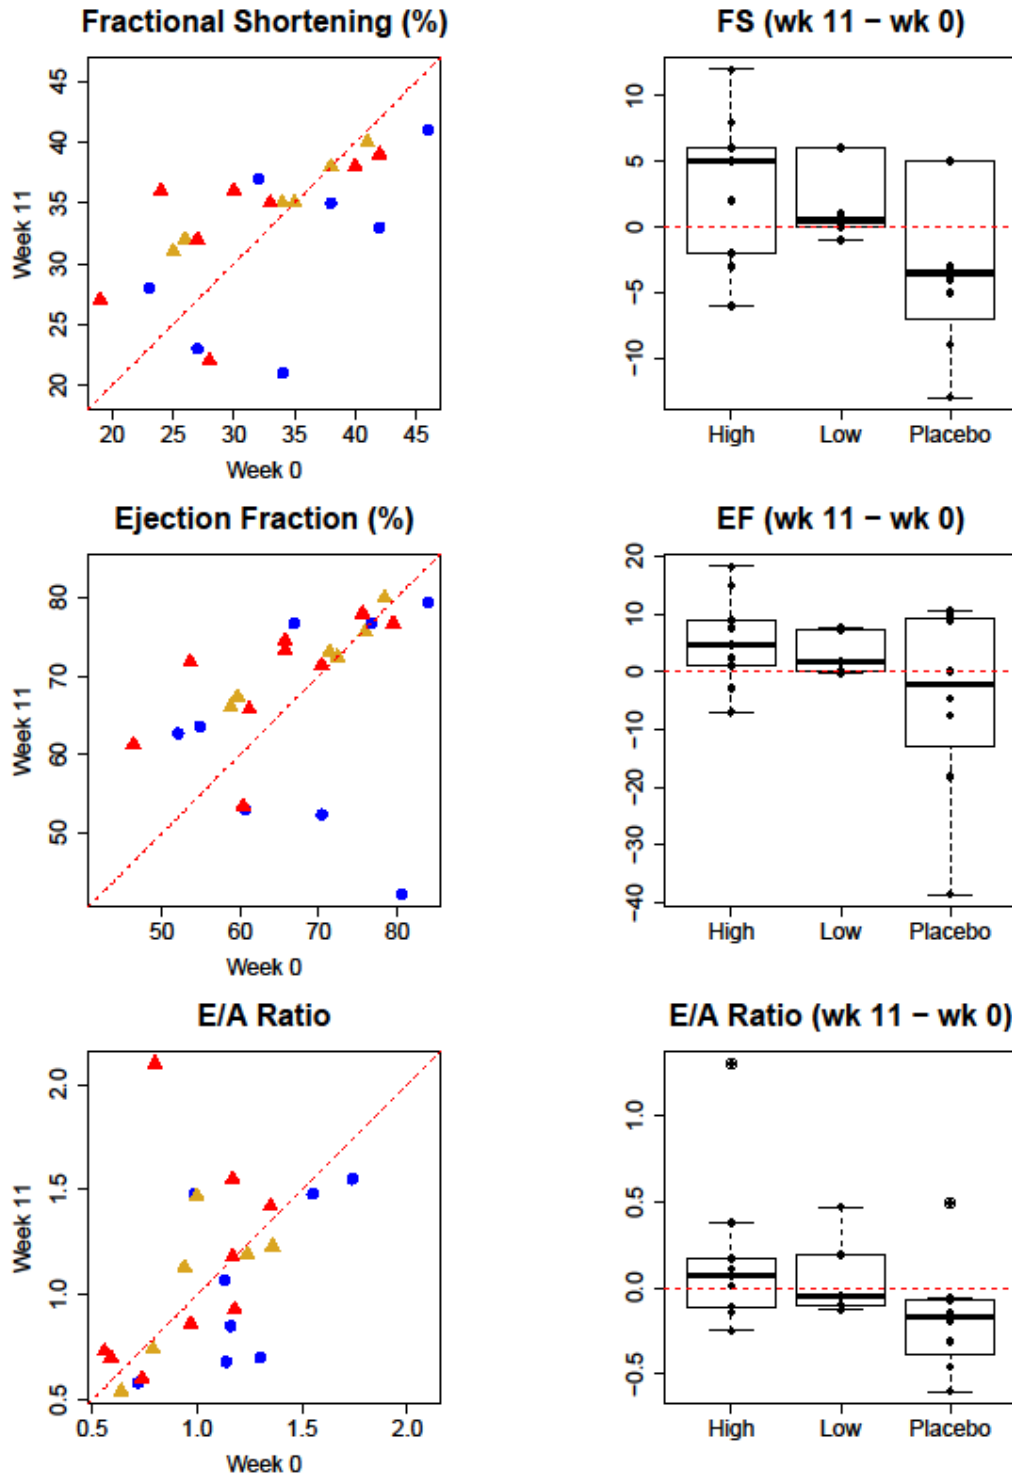

**Supplemental Figure 2.** Power model for detecting effects of rapamycin on cardiac parameters. The power model is based on Cohen's D, which is a measure of effect size, here calculated as  $t^2/\text{sqrt}(\text{df})$  from each t-test. For sample size, it is assumed that 1/3 of the dogs receive placebo and 2/3 receive rapamycin.

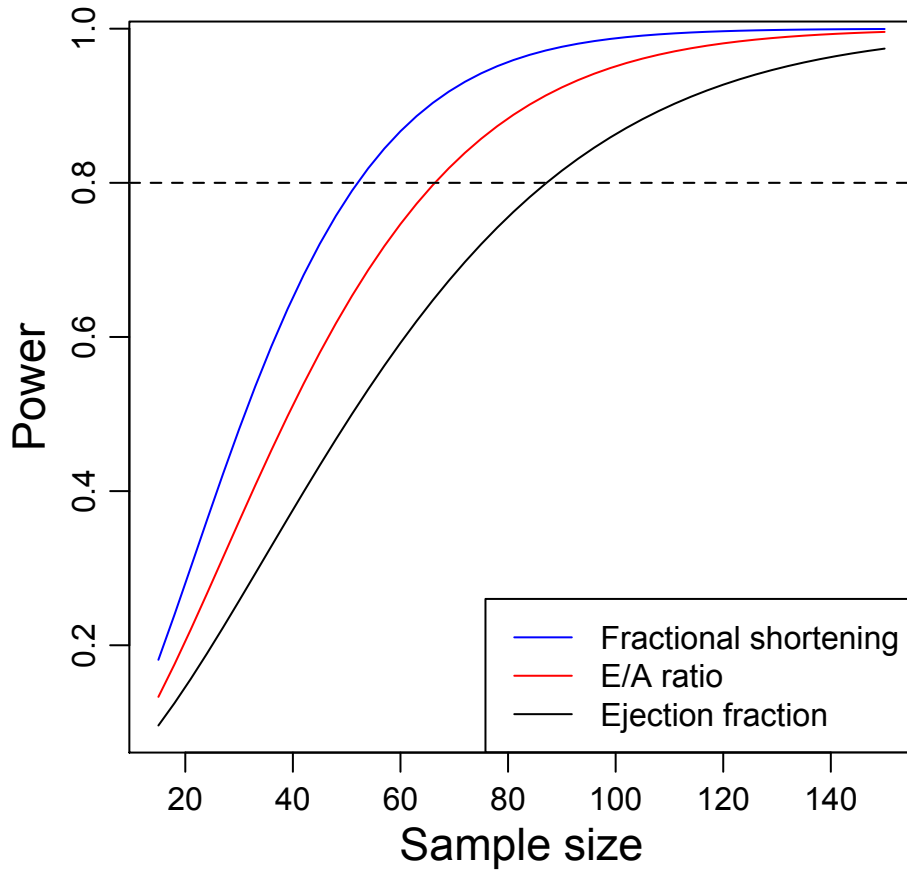

**Supplemental Table 1. Summary of Hematology and Blood Chemistry for dogs receiving placebo or rapamycin at weeks 0, 3 and 11.** The frequency of measures outside of the reference range was not different for any of the measured parameters between treatment groups and mean value for all parameters remained within normal limits. TP: Total Protein, ALB: Albumin, GLOB: Globulins, ALB/GLOB: Albumin/Globulin Ratio, AST: Aspartate Aminotransferase, ALT: Alanine Aminotransferase, AP: Alkaline Phosphatase, GGT: Gamma-Glutamyl Transpeptidase, BILI: Bilirubin, BUN: Blood Urea Nitrogen, CREA: Creatinine, BUN/CREA: Urea/Creatinine ratio, P: Phosphorus, GLU: Glucose, Ca: Calcium, Mg: Magnesium, Na: Sodium, K: Potassium, Na/K: Sodium/Potassium Ratio, Cl: Chlorine, CHOL: Cholesterol, TRI: Triglycerides, AMY: Amylase, CPK: Creatine Phosphokinase, T4: Thyroxine, T4 Eq: Thyroxine equilibrium, WBC: White Blood Cells, RBC: Red Blood Cells, HGB: Hemoglobin, HCT: Hematocrit, MCV: Mean Corpuscular Volume, MCH: Mean Corpuscular Hemoglobin, MCHC: Mean Corpuscular Hemoglobin Content, LYM: Lymphocytes, PMN: Neutrophilic Granulocytes, PLAT: Platelets, MONO: Monocytes, EOS: Eosinophilic Granulocytes. P values are for unadjusted Wilcoxon two-sided tests comparing the values at weeks 3 and 11 to baseline values. No significant differences were detected after controlling for multiple comparisons (Padj=0.00017).

| Parameter | Reference Range |          | Placebo  |          |          |          |          |          |
|-----------|-----------------|----------|----------|----------|----------|----------|----------|----------|
|           | Low             | High     | Week 0   |          | Week 3   |          | Week 11  |          |
|           |                 |          | Mean     | SE       | Mean     | SE       | Mean     | SE       |
| TP        | 5.00            | 7.40     | 6.06     | 0.09     | 6.08     | 0.17     | 6.33     | 0.16     |
| ALB       | 2.70            | 4.40     | 3.51     | 0.09     | 3.48     | 0.06     | 3.45     | 0.09     |
| GLOB      | 1.60            | 3.60     | 2.55     | 0.13     | 2.60     | 0.18     | 2.88     | 0.20     |
| ALB/GLOB  | 0.80            | 2.00     | 1.43     | 0.11     | 1.41     | 0.14     | 1.24     | 0.09     |
| AST       | 15.00           | 66.00    | 24.50    | 1.97     | 25.88    | 1.22     | 25.75    | 1.93     |
| ALT       | 12.00           | 118.00   | 38.50    | 10.59    | 39.75    | 9.29     | 41.88    | 9.16     |
| AP        | 5.00            | 131.00   | 22.50    | 3.54     | 24.50    | 4.39     | 29.63    | 6.25     |
| GGT       | 1.00            | 12.00    | 5.50     | 1.27     | 7.63     | 1.29     | 4.63     | 1.32     |
| BILI      | 0.10            | 0.30     | 0.15     | 0.02     | 0.14     | 0.02     | 0.14     | 0.02     |
| BUN       | 6.00            | 31.00    | 17.13    | 1.41     | 15.63    | 1.57     | 17.75    | 1.50     |
| CREA      | 0.50            | 1.60     | 1.16     | 0.07     | 1.14     | 0.07     | 1.15     | 0.03     |
| BUN/CREA  | 4.00            | 27.00    | 14.88    | 1.20     | 13.75    | 1.18     | 15.50    | 1.18     |
| P         | 2.50            | 6.00     | 3.34     | 0.20     | 3.60     | 0.22     | 3.38     | 0.27     |
| GLU       | 70.00           | 138.00   | 105.88   | 3.16     | 95.50    | 2.63     | 101.13   | 3.00     |
| Ca        | 8.90            | 11.40    | 9.89     | 0.06     | 9.78     | 0.08     | 9.85     | 0.08     |
| Mg        | 1.50            | 2.50     | 1.71     | 0.04     | 1.71     | 0.06     | 1.66     | 0.04     |
| Na        | 139.00          | 154.00   | 147.13   | 0.72     | 148.25   | 0.56     | 147.88   | 0.67     |
| K         | 3.60            | 5.50     | 4.51     | 0.12     | 4.41     | 0.12     | 4.46     | 0.13     |
| Na/K      | 27.00           | 38.00    | 32.63    | 0.96     | 33.75    | 0.88     | 33.38    | 1.10     |
| Cl        | 102.00          | 120.00   | 114.25   | 1.18     | 114.25   | 1.01     | 114.25   | 0.75     |
| CHOL      | 92.00           | 324.00   | 233.13   | 25.20    | 231.25   | 23.97    | 234.00   | 22.57    |
| TRI       | 29.00           | 291.00   | 110.25   | 26.87    | 100.88   | 22.61    | 113.75   | 26.41    |
| AMY       | 290.00          | 1125.00  | 510.75   | 71.95    | 489.63   | 55.42    | 528.50   | 59.17    |
| CPK       | 59.00           | 895.00   | 102.75   | 16.23    | 110.25   | 10.04    | 164.13   | 33.76    |
| T4        | 0.80            | 3.50     | 1.79     | 0.22     | 1.74     | 0.14     | 1.74     | 0.23     |
| T4 Eq     | 8.00            | 40.00    | 17.38    | 1.98     | 16.75    | 1.91     | 16.01    | 1.16     |
| WBC       | 4.00E+03        | 1.55E+04 | 7.24E+03 | 2.83E+02 | 8.10E+03 | 4.54E+02 | 7.74E+03 | 6.17E+02 |
| RBC       | 4.80E+06        | 9.30E+06 | 7.14E+06 | 2.61E+05 | 7.05E+06 | 2.65E+05 | 7.15E+06 | 2.63E+05 |
| HGB       | 12.10           | 20.30    | 17.14    | 0.30     | 16.70    | 0.44     | 17.24    | 0.35     |
| HCT       | 36.00           | 60.00    | 50.63    | 0.92     | 49.88    | 1.52     | 50.50    | 1.04     |
| MCV       | 58.00           | 79.00    | 71.00    | 1.40     | 70.88    | 1.36     | 71.25    | 1.50     |
| MCH       | 19.00           | 28.00    | 24.18    | 0.51     | 23.81    | 0.49     | 24.23    | 0.44     |
| MCHC      | 30.00           | 38.00    | 34.13    | 0.30     | 33.63    | 0.32     | 34.00    | 0.27     |
| LYM       | 1.70E+05        | 4.00E+05 | 1.37E+03 | 3.50E+02 | 2.13E+03 | 2.00E+02 | 1.86E+03 | 1.81E+02 |
| PMN       | 2.06E+03        | 1.06E+04 | 4.74E+03 | 2.46E+02 | 5.11E+03 | 4.01E+02 | 5.01E+03 | 5.51E+02 |
| PLAT      | 6.90E+02        | 4.50E+03 | 2.48E+05 | 1.90E+04 | 2.63E+05 | 2.50E+04 | 2.56E+05 | 2.70E+04 |
| MONO      | 0.00            | 840.00   | 235.13   | 74.07    | 367.63   | 42.74    | 388.38   | 39.12    |
| EOS       | 0.00            | 1200.00  | 255.13   | 76.94    | 503.75   | 79.05    | 483.38   | 81.14    |

| Parameter | Reference Range |          | Pooled Rapamycin |          |          |          |          |          |
|-----------|-----------------|----------|------------------|----------|----------|----------|----------|----------|
|           | Low             | High     | Week 0           |          | Week 3   |          | Week 11  |          |
|           |                 |          | Mean             | SE       | Mean     | SE       | Mean     | SE       |
| TP        | 5.00            | 7.40     | 6.28             | 0.09     | 6.28     | 0.07     | 6.42     | 0.09     |
| ALB       | 2.70            | 4.40     | 3.59             | 0.06     | 3.50     | 0.06     | 3.53     | 0.07     |
| GLOB      | 1.60            | 3.60     | 2.68             | 0.10     | 2.78     | 0.08     | 2.89     | 0.10     |
| ALB/GLOB  | 0.80            | 2.00     | 1.39             | 0.08     | 1.29     | 0.05     | 1.26     | 0.06     |
| AST       | 15.00           | 66.00    | 24.69            | 1.76     | 28.13    | 1.62     | 33.44    | 3.02     |
| ALT       | 12.00           | 118.00   | 41.38            | 4.83     | 43.25    | 5.82     | 38.31    | 2.87     |
| AP        | 5.00            | 131.00   | 33.56            | 6.10     | 33.50    | 4.36     | 30.81    | 4.85     |
| GGT       | 1.00            | 12.00    | 3.31             | 0.83     | 4.75     | 0.91     | 3.75     | 0.85     |
| BILI      | 0.10            | 0.30     | 0.15             | 0.01     | 0.13     | 0.01     | 0.15     | 0.01     |
| BUN       | 6.00            | 31.00    | 18.56            | 1.54     | 17.56    | 1.62     | 17.19    | 1.19     |
| CREA      | 0.50            | 1.60     | 1.12             | 0.05     | 1.11     | 0.07     | 1.12     | 0.05     |
| BUN/CREA  | 4.00            | 27.00    | 16.75            | 1.31     | 16.19    | 1.32     | 15.63    | 1.03     |
| P         | 2.50            | 6.00     | 3.45             | 0.17     | 3.64     | 0.20     | 3.41     | 0.18     |
| GLU       | 70.00           | 138.00   | 101.81           | 2.08     | 98.56    | 1.99     | 101.00   | 2.23     |
| Ca        | 8.90            | 11.40    | 10.07            | 0.08     | 10.03    | 0.08     | 10.03    | 0.07     |
| Mg        | 1.50            | 2.50     | 1.74             | 0.03     | 1.75     | 0.04     | 1.73     | 0.04     |
| Na        | 139.00          | 154.00   | 148.00           | 0.40     | 147.25   | 0.52     | 147.06   | 0.37     |
| K         | 3.60            | 5.50     | 4.46             | 0.06     | 4.48     | 0.07     | 4.38     | 0.06     |
| Na/K      | 27.00           | 38.00    | 33.19            | 0.48     | 32.88    | 0.55     | 33.75    | 0.45     |
| Cl        | 102.00          | 120.00   | 113.88           | 0.58     | 113.13   | 0.87     | 112.81   | 0.53     |
| CHOL      | 92.00           | 324.00   | 246.56           | 17.66    | 272.25   | 20.80    | 259.38   | 19.89    |
| TRI       | 29.00           | 291.00   | 122.25           | 11.97    | 132.19   | 23.37    | 137.31   | 27.45    |
| AMY       | 290.00          | 1125.00  | 444.88           | 34.96    | 513.56   | 39.31    | 508.50   | 36.15    |
| CPK       | 59.00           | 895.00   | 107.19           | 14.45    | 138.25   | 29.21    | 140.87   | 30.82    |
| T4        | 0.80            | 3.50     | 1.72             | 0.09     | 1.64     | 0.09     | 1.64     | 0.10     |
| T4 Eq     | 8.00            | 40.00    | 15.33            | 1.24     | 16.48    | 1.98     | 16.49    | 1.34     |
| WBC       | 4.00E+03        | 1.55E+04 | 6.85E+03         | 4.56E+02 | 7.76E+03 | 7.39E+02 | 7.46E+03 | 4.63E+02 |
| RBC       | 4.80E+06        | 9.30E+06 | 7.02E+06         | 1.50E+05 | 7.09E+06 | 1.53E+05 | 7.14E+06 | 1.81E+05 |
| HGB       | 12.10           | 20.30    | 16.96            | 0.39     | 17.08    | 0.36     | 17.08    | 0.42     |
| HCT       | 36.00           | 60.00    | 50.38            | 1.06     | 50.44    | 0.94     | 50.06    | 1.12     |
| MCV       | 58.00           | 79.00    | 71.81            | 0.97     | 71.06    | 1.00     | 70.25    | 0.81     |
| MCH       | 19.00           | 28.00    | 24.19            | 0.40     | 24.13    | 0.39     | 23.99    | 0.40     |
| MCHC      | 30.00           | 38.00    | 33.81            | 0.23     | 34.00    | 0.18     | 34.06    | 0.25     |
| LYM       | 1.70E+05        | 4.00E+05 | 1.37E+03         | 8.84E+01 | 1.49E+03 | 1.06E+02 | 1.36E+03 | 1.02E+02 |
| PMN       | 2.06E+03        | 1.06E+04 | 4.79E+03         | 3.54E+02 | 5.62E+03 | 5.73E+02 | 5.41E+03 | 3.55E+02 |
| PLAT      | 6.90E+02        | 4.50E+03 | 2.34E+05         | 1.73E+04 | 2.45E+05 | 1.96E+04 | 2.61E+05 | 1.82E+04 |
| MONO      | 0.00            | 840.00   | 335.06           | 53.56    | 340.25   | 52.42    | 393.94   | 61.96    |
| EOS       | 0.00            | 1200.00  | 354.75           | 44.19    | 308.13   | 67.41    | 303.75   | 39.78    |

| Parameter | Reference Range |          | Low Rapamycin |          |          |          |          |          |
|-----------|-----------------|----------|---------------|----------|----------|----------|----------|----------|
|           | Low             | High     | Week 0        |          | Week 3   |          | Week 11  |          |
|           |                 |          | Mean          | SE       | Mean     | SE       | Mean     | SE       |
| TP        | 5.00            | 7.40     | 6.16          | 0.17     | 6.42     | 0.15     | 6.48     | 0.14     |
| ALB       | 2.70            | 4.40     | 3.64          | 0.11     | 3.52     | 0.12     | 3.58     | 0.15     |
| GLOB      | 1.60            | 3.60     | 2.52          | 0.24     | 2.90     | 0.18     | 2.90     | 0.20     |
| ALB/GLOB  | 0.80            | 2.00     | 1.54          | 0.21     | 1.22     | 0.10     | 1.30     | 0.14     |
| AST       | 15.00           | 66.00    | 19.00         | 0.84     | 23.60    | 1.96     | 28.40    | 2.58     |
| ALT       | 12.00           | 118.00   | 28.00         | 4.09     | 46.80    | 18.03    | 29.00    | 2.47     |
| AP        | 5.00            | 131.00   | 20.60         | 4.53     | 28.00    | 5.09     | 24.60    | 5.45     |
| GGT       | 1.00            | 12.00    | 2.00          | 0.77     | 6.60     | 1.29     | 4.40     | 1.89     |
| BILI      | 0.10            | 0.30     | 0.14          | 0.02     | 0.14     | 0.02     | 0.12     | 0.02     |
| BUN       | 6.00            | 31.00    | 22.80         | 2.67     | 21.00    | 3.39     | 19.60    | 2.89     |
| CREA      | 0.50            | 1.60     | 1.12          | 0.06     | 1.14     | 0.19     | 1.00     | 0.08     |
| BUN/CREA  | 4.00            | 27.00    | 20.20         | 2.06     | 18.40    | 1.54     | 19.40    | 2.16     |
| P         | 2.50            | 6.00     | 3.86          | 0.35     | 3.74     | 0.40     | 3.54     | 0.33     |
| GLU       | 70.00           | 138.00   | 98.20         | 2.33     | 101.60   | 4.25     | 94.80    | 1.98     |
| Ca        | 8.90            | 11.40    | 10.36         | 0.15     | 10.18    | 0.21     | 10.14    | 0.19     |
| Mg        | 1.50            | 2.50     | 1.76          | 0.05     | 1.78     | 0.10     | 1.78     | 0.06     |
| Na        | 139.00          | 154.00   | 147.60        | 0.51     | 148.60   | 1.29     | 147.80   | 0.73     |
| K         | 3.60            | 5.50     | 4.52          | 0.16     | 4.54     | 0.14     | 4.56     | 0.09     |
| Na/K      | 27.00           | 38.00    | 32.80         | 1.07     | 32.80    | 1.28     | 32.60    | 0.75     |
| Cl        | 102.00          | 120.00   | 113.40        | 1.29     | 114.60   | 1.57     | 114.20   | 1.16     |
| CHOL      | 92.00           | 324.00   | 273.20        | 39.21    | 289.40   | 42.65    | 272.80   | 35.90    |
| TRI       | 29.00           | 291.00   | 110.80        | 23.28    | 105.60   | 7.35     | 175.00   | 68.41    |
| AMY       | 290.00          | 1125.00  | 507.40        | 83.46    | 490.80   | 67.05    | 476.00   | 68.47    |
| CPK       | 59.00           | 895.00   | 76.00         | 8.70     | 97.20    | 11.67    | 106.20   | 14.47    |
| T4        | 0.80            | 3.50     | 1.66          | 0.13     | 1.50     | 0.15     | 1.76     | 0.19     |
| T4 Eq     | 8.00            | 40.00    | 13.40         | 0.97     | 13.26    | 0.78     | 15.10    | 0.81     |
| WBC       | 4.00E+03        | 1.55E+04 | 6.84E+03      | 8.99E+02 | 7.58E+03 | 1.16E+03 | 7.48E+03 | 1.17E+03 |
| RBC       | 4.80E+06        | 9.30E+06 | 7.02E+06      | 3.71E+05 | 7.04E+06 | 4.25E+05 | 7.02E+06 | 3.92E+05 |
| HGB       | 12.10           | 20.30    | 16.82         | 0.63     | 16.90    | 0.74     | 16.84    | 0.63     |
| HCT       | 36.00           | 60.00    | 50.00         | 1.90     | 50.60    | 1.94     | 49.20    | 1.93     |
| MCV       | 58.00           | 79.00    | 71.20         | 1.74     | 72.20    | 2.13     | 69.60    | 1.66     |
| MCH       | 19.00           | 28.00    | 24.04         | 0.60     | 24.14    | 0.83     | 24.00    | 0.67     |
| MCHC      | 30.00           | 38.00    | 33.80         | 0.20     | 33.60    | 0.24     | 34.20    | 0.20     |
| LYM       | 1.70E+05        | 4.00E+05 | 1.24E+03      | 1.90E+02 | 1.29E+03 | 2.09E+02 | 1.28E+03 | 2.08E+02 |
| PMN       | 2.06E+03        | 1.06E+04 | 5.01E+03      | 6.90E+02 | 5.75E+03 | 9.17E+02 | 5.60E+03 | 9.24E+02 |
| PLAT      | 6.90E+02        | 4.50E+03 | 2.54E+05      | 4.28E+04 | 3.03E+05 | 4.56E+04 | 2.86E+05 | 3.05E+04 |
| MONO      | 0.00            | 840.00   | 321.20        | 57.51    | 343.60   | 59.82    | 340.80   | 59.60    |
| EOS       | 0.00            | 1200.00  | 267.40        | 78.47    | 192.60   | 58.32    | 261.00   | 65.87    |

| Parameter | Reference Range |          | High Rapamycin |          |          |          |          |          |
|-----------|-----------------|----------|----------------|----------|----------|----------|----------|----------|
|           | Low             | High     | Week 0         |          | Week 3   |          | Week 11  |          |
|           |                 |          | Mean           | SE       | Mean     | SE       | Mean     | SE       |
| TP        | 5.00            | 7.40     | 6.38           | 0.10     | 6.24     | 0.08     | 6.44     | 0.12     |
| ALB       | 2.70            | 4.40     | 3.59           | 0.09     | 3.48     | 0.07     | 3.50     | 0.08     |
| GLOB      | 1.60            | 3.60     | 2.79           | 0.10     | 2.76     | 0.09     | 2.94     | 0.12     |
| ALB/GLOB  | 0.80            | 2.00     | 1.31           | 0.07     | 1.30     | 0.06     | 1.21     | 0.06     |
| AST       | 15.00           | 66.00    | 27.30          | 2.35     | 30.40    | 2.10     | 36.60    | 4.46     |
| ALT       | 12.00           | 118.00   | 43.80          | 5.27     | 40.50    | 3.93     | 41.80    | 3.59     |
| AP        | 5.00            | 131.00   | 41.40          | 8.74     | 37.90    | 6.16     | 35.10    | 7.10     |
| GGT       | 1.00            | 12.00    | 4.00           | 1.24     | 4.20     | 1.20     | 3.70     | 1.01     |
| BILI      | 0.10            | 0.30     | 0.15           | 0.02     | 0.12     | 0.01     | 0.16     | 0.02     |
| BUN       | 6.00            | 31.00    | 16.50          | 1.81     | 16.00    | 1.87     | 15.50    | 1.00     |
| CREA      | 0.50            | 1.60     | 1.07           | 0.05     | 1.04     | 0.04     | 1.12     | 0.03     |
| BUN/CREA  | 4.00            | 27.00    | 15.60          | 1.58     | 15.70    | 1.84     | 14.00    | 0.79     |
| P         | 2.50            | 6.00     | 3.28           | 0.19     | 3.54     | 0.25     | 3.38     | 0.24     |
| GLU       | 70.00           | 138.00   | 102.70         | 2.93     | 97.20    | 2.40     | 102.30   | 2.53     |
| Ca        | 8.90            | 11.40    | 9.96           | 0.07     | 9.96     | 0.09     | 9.98     | 0.07     |
| Mg        | 1.50            | 2.50     | 1.73           | 0.04     | 1.71     | 0.05     | 1.69     | 0.05     |
| Na        | 139.00          | 154.00   | 148.40         | 0.54     | 146.60   | 0.45     | 146.80   | 0.44     |
| K         | 3.60            | 5.50     | 4.47           | 0.06     | 4.44     | 0.08     | 4.30     | 0.07     |
| Na/K      | 27.00           | 38.00    | 33.10          | 0.53     | 33.00    | 0.65     | 34.30    | 0.56     |
| Cl        | 102.00          | 120.00   | 114.00         | 0.71     | 112.40   | 1.14     | 112.10   | 0.55     |
| CHOL      | 92.00           | 324.00   | 233.00         | 20.74    | 263.80   | 26.93    | 251.40   | 27.39    |
| TRI       | 29.00           | 291.00   | 122.70         | 14.96    | 141.60   | 37.13    | 103.50   | 22.69    |
| AMY       | 290.00          | 1125.00  | 430.10         | 34.19    | 544.50   | 50.61    | 543.40   | 43.15    |
| CPK       | 59.00           | 895.00   | 113.80         | 19.78    | 151.60   | 45.54    | 163.89   | 50.47    |
| T4        | 0.80            | 3.50     | 1.74           | 0.13     | 1.70     | 0.13     | 1.57     | 0.14     |
| T4 Eq     | 8.00            | 40.00    | 16.16          | 1.79     | 18.24    | 3.06     | 16.51    | 2.00     |
| WBC       | 4.00E+03        | 1.55E+04 | 7.11E+03       | 5.44E+02 | 8.14E+03 | 1.02E+03 | 7.79E+03 | 3.59E+02 |
| RBC       | 4.80E+06        | 9.30E+06 | 7.05E+06       | 1.69E+05 | 7.11E+06 | 1.49E+05 | 7.18E+06 | 2.28E+05 |
| HGB       | 12.10           | 20.30    | 17.09          | 0.56     | 17.09    | 0.46     | 17.11    | 0.60     |
| HCT       | 36.00           | 60.00    | 50.70          | 1.46     | 50.20    | 1.22     | 50.30    | 1.56     |
| MCV       | 58.00           | 79.00    | 72.00          | 1.33     | 70.40    | 1.23     | 70.40    | 1.05     |
| MCH       | 19.00           | 28.00    | 24.22          | 0.58     | 24.06    | 0.49     | 23.93    | 0.57     |
| MCHC      | 30.00           | 38.00    | 33.80          | 0.36     | 34.20    | 0.25     | 34.00    | 0.39     |
| LYM       | 1.70E+05        | 4.00E+05 | 1.47E+03       | 9.69E+01 | 1.59E+03 | 1.31E+02 | 1.42E+03 | 1.28E+02 |
| PMN       | 2.06E+03        | 1.06E+04 | 4.87E+03       | 4.25E+02 | 5.82E+03 | 7.75E+02 | 5.60E+03 | 2.27E+02 |
| PLAT      | 6.90E+02        | 4.50E+03 | 2.27E+05       | 1.87E+04 | 2.24E+05 | 1.52E+04 | 2.53E+05 | 2.46E+04 |
| MONO      | 0.00            | 840.00   | 354.00         | 81.88    | 353.40   | 79.18    | 439.40   | 93.08    |
| EOS       | 0.00            | 1200.00  | 408.10         | 54.72    | 377.50   | 99.68    | 335.00   | 54.20    |
